# Supplementary material for: A rapid and efficient method for uniform gene expression using the barley stripe mosaic virus
Source: PubMed Central journal article supplement (PMC5387290; doi:10.1186/s13007-017-0175-5), 2017-04-11
Supplement: 13007_2017_175_MOESM2_ESM.pdf [file 13007_2017_175_MOESM2_ESM.pdf]

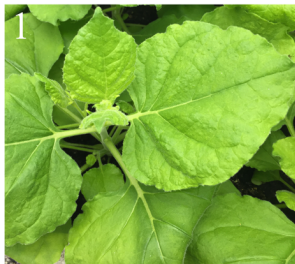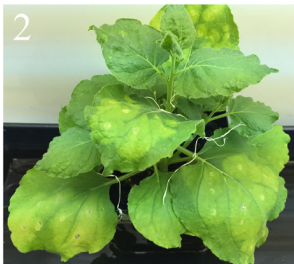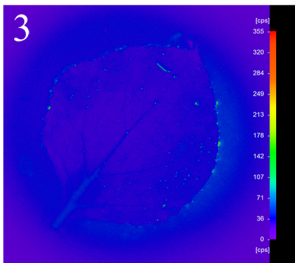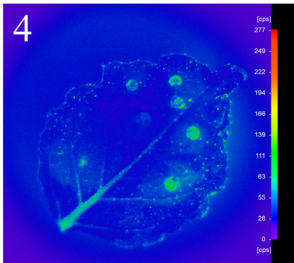

Figure S2
